# Supplementary material for: From multiplicity of infection to force of infection in sparsely sampled high-transmission Plasmodium falciparum populations
Source: medRxiv preprint, doi:10.1101/2024.02.12.24302148, version 5 (2026-04-05)
Supplement: supplementary file 4 [file 302148_file05.xlsx]

## Sheet: Sheet1
State
